# Supplementary material for: Detection of coalescing agents in water-borne latex emulsions using an environment sensitive fluorescent probe
Source: Royal Society of Chemistry journal article supplement (doi:10.1039/c0pp00065e), 2010-05-04
Supplement: c0pp00065e.pdf [file c0pp00065e.pdf]

## Supporting Information

### **Detection of coalescing agents in water borne latex emulsions using an environment sensitive fluorescent probe**

Tanzeela Nazir Raja<sup>a</sup>, Albert M. Brouwer<sup>\*a</sup>, Koen Biemans<sup>b</sup>, Tijs Nabuurs<sup>b</sup> and Ronald Tennebroek<sup>b</sup>

<sup>a</sup>Universiteit van Amsterdam, Van't Hoff Institute for Molecular Sciences, Nieuwe Achtergracht 129, 1018 WS  
Amsterdam, The Netherlands

<sup>b</sup>DSM NeoResins Sluisweg 12, 5145 PE Waalwijk, The Netherlands

---

### Emulsion Polymerization recipe

Table S1. Emulsion polymerization recipe for the preparation of labeled and non-labeled low and high  $T_g$  styrene-co-ethylhexylacrylate (S/2-EHA) latices.

| Component weight (g)                | Non-labeled |           | Labeled   |           |
|-------------------------------------|-------------|-----------|-----------|-----------|
|                                     | S/2-EHA20   | S/2-EHA60 | S/2-EHA20 | S/2-EHA60 |
| Water                               | 885         | 885       | 885       | 885       |
| Sodium laurylsulphate (SLS)         | 19.704      | 19.704    | 19.704    | 19.704    |
| ammonium phosphate (AP)             | 1.77        | 1.77      | 1.77      | 1.77      |
| MFT (1) fluorescent probe           | 0           | 0         | 0.012     | 0.012     |
| acrylic acid                        | 11.823      | 11.823    | 11.823    | 11.823    |
| Styrene                             | 339.128     | 473.505   | 339.128   | 473.505   |
| 2-ethylhexylacrylate                | 240.183     | 105.794   | 240.183   | 105.794   |
| isoascorbic acid 5%                 | 0.60        | 0.60      | 0.60      | 0.60      |
| tert-butyl hydroxyperoxide (t-BHPO) | 0.84        | 0.84      | 0.84      | 0.84      |
| Proxel ultra 10                     | 1.5         | 1.5       | 1.5       | 1.5       |

Table S2. Emulsion polymerization recipe for the preparation of labeled and non-labeled low and high  $T_g$  methyl methacrylate-co-ethylacrylate (MMA/EA) latices.

| Component weight (g)                | Non-labeled |          | Labeled  |          |
|-------------------------------------|-------------|----------|----------|----------|
|                                     | MMA/EA20    | MMA/EA60 | MMA/EA20 | MMA/EA60 |
| Water                               | 885         | 885      | 885      | 885      |
| Sodium laurylsulphate (SLS)         | 19.704      | 19.704   | 19.704   | 19.704   |
| ammonium phosphate (AP)             | 1.77        | 1.77     | 1.77     | 1.77     |
| MFT (1) fluorescent probe           | 0           | 0        | 0.012    | 0.012    |
| acrylic acid                        | 11.82       | 11.82    | 11.82    | 11.82    |
| methyl methacrylate (MMA)           | 248.292     | 425.11   | 248.292  | 425.11   |
| ethylacrylate (EA)                  | 331.007     | 154.189  | 331.007  | 154.189  |
| isoascorbic acid 5%                 | 0.60        | 0.60     | 0.60     | 0.60     |
| tert-butyl hydroxyperoxide (t-BHPO) | 0.84        | 0.84     | 0.84     | 0.84     |
| Proxel ultra 10                     | 1.5         | 1.5      | 1.5      | 1.5      |

### Physical Characteristics of Coalescing Agents

Table S3. Physical properties of the five coalescing agents used in present research work.

| Coalescing agent | Mol. Wt.<br>(g/mol) | Water solubility<br>(%) | Viscosity (mPa s) | Surface tension<br>(dynes/cm) | bp (°C) |
|------------------|---------------------|-------------------------|-------------------|-------------------------------|---------|
| EEH              | 174.3               | 0.2                     | 7.0               | 27.6                          | 224     |
| Texanol          | 216.3               | 2                       |                   | 28.9                          | 244     |
| DPnB             | 190.3               | 5                       | 4.4               | 28.8                          | 229     |
| EEA              | 132.2               | 24                      | 1.3               | 28.2                          | 150     |
| DPM              | 148.2               | 100                     | 3.4               | 29                            | 188     |

### Steady-State Fluorescence Data of Latices

Table S4. Fluorescence emission  $\lambda_{max}$  of hydrophobic S/2-EHA latices formulated with the five coalescing agents.

| %w/w | EEH | Emission maximum (nm) |      |     |     |
|------|-----|-----------------------|------|-----|-----|
|      |     | Texanol               | DPnB | EEA | DPM |
|      |     | S/2-EHA20             |      |     |     |
| 0    | 453 | 449                   | 449  | 449 |     |
| 3    | 459 | 456                   | 455  | 455 |     |
| 6    | 466 | 463                   | 462  | 461 |     |
| 9    | 472 | 470                   | 468  | 469 |     |
|      |     | S/2-EHA60             |      |     |     |
| 0    | 449 | 448                   | 448  | 445 | 448 |
| 3    | 454 | 452                   | 453  | 451 | 449 |
| 6    | 458 | 456                   | 455  | 455 | 450 |
| 9    | 462 | 460                   | 460  | 460 | 450 |

Table S5. Fluorescence emission  $\lambda_{max}$  of hydrophilic MMA/EA latices formulated with the five coalescing agents.

| %w/w | EEH | Emission maximum (nm) |      |     |     |
|------|-----|-----------------------|------|-----|-----|
|      |     | Texanol               | DPnB | EEA | DPM |
|      |     | MMA/EA20              |      |     |     |
| 0    | 479 | 477                   | 477  | 478 | 477 |
| 3    | 485 | 482                   | 485  | 484 | 479 |
| 6    | 493 | 489                   | 493  | 493 | 480 |
| 9    | 499 | 495                   | 499  | 501 | 481 |
|      |     | MMA/EA60              |      |     |     |
| 0    | 469 | 468                   | 468  | 469 | 468 |
| 3    | 473 | 469                   | 471  | 472 | 469 |
| 6    | 479 | 474                   | 478  | 477 | 470 |
| 9    | 484 | 479                   | 486  | 484 | 470 |

### Steady-State fluorescence band shape parameters

Table S6. Fluorescence band shape parameters of S/2-EHA  $T_g$  20 °C latex, values obtained after fitting steady-state data with equation 1.

| S/2-EHA $T_g$ 20 °C |                    |                       |            |      |
|---------------------|--------------------|-----------------------|------------|------|
| Co-solvent % w/w    | Emission max. (nm) | Intensity (a.u.)      | Width (nm) | Skew |
| EEH 0%              | 452.6              | $3.52 \times 10^{08}$ | 105        | 0.35 |
| EEH 3%              | 458.8              | $3.39 \times 10^{08}$ | 114        | 0.42 |
| EEH 6%              | 466.4              | $2.97 \times 10^{08}$ | 115        | 0.36 |
| EEH 9%              | 471.9              | $2.66 \times 10^{08}$ | 124        | 0.37 |
| Texanol 0%          | 449.4              | $1.18 \times 10^{06}$ | 82         | 0.42 |
| Texanol 3%          | 456.1              | $9.35 \times 10^{05}$ | 88         | 0.39 |
| Texanol 6%          | 462.6              | $8.24 \times 10^{05}$ | 95         | 0.37 |
| Texanol 9%          | 469.9              | $7.35 \times 10^{05}$ | 100        | 0.36 |
| DPnB 0%             | 449.4              | $5.62 \times 10^{04}$ | 81         | 0.42 |
| DPnB 3%             | 455.4              | $4.80 \times 10^{04}$ | 87         | 0.40 |
| DPnB 6%             | 462.1              | $4.18 \times 10^{04}$ | 93         | 0.38 |
| DPnB 9%             | 467.9              | $3.76 \times 10^{04}$ | 99         | 0.36 |
| EEA 0%              | 448.7              | $1.59 \times 10^{08}$ | 81         | 0.40 |
| EEA 3%              | 454.7              | $1.32 \times 10^{08}$ | 87         | 0.38 |
| EEA 6%              | 460.9              | $1.16 \times 10^{08}$ | 93         | 0.37 |
| EEA 9%              | 468.6              | $1.05 \times 10^{08}$ | 100        | 0.34 |
| DPM 0%              | 441.6              | $4.23 \times 10^{08}$ | 95         | 0.43 |
| DPM 3%              | 441.9              | $1.48 \times 10^{08}$ | 86         | 0.48 |
| DPM 6%              | 442.6              | $1.99 \times 10^{08}$ | 87         | 0.50 |
| DPM 9%              | 441.6              | $1.32 \times 10^{07}$ | 80         | 0.49 |

Table S7. Fluorescence parameters of S/2-EHA  $T_g$  60 °C latex, obtained after fitting band shapes with equation 1.

| Co-solvent % w/w | S/2-EHA $T_g$ 60 °C |                       |            |      |
|------------------|---------------------|-----------------------|------------|------|
|                  | Emission max. (nm)  | Intensity (a.u.)      | Width (nm) | Skew |
| EEH 0%           | 448.7               | $2.84 \times 10^{08}$ | 100        | 0.42 |
| EEH 3%           | 454.1               | $2.73 \times 10^{08}$ | 107        | 0.37 |
| EEH 6%           | 458.4               | $2.59 \times 10^{08}$ | 112        | 0.35 |
| EEH 9%           | 461.7               | $2.40 \times 10^{08}$ | 117        | 0.40 |
| Texanol 0%       | 447.6               | $4.47 \times 10^{05}$ | 82         | 0.43 |
| Texanol 3%       | 452.2               | $4.66 \times 10^{05}$ | 88         | 0.41 |
| Texanol 6%       | 456.3               | $4.45 \times 10^{05}$ | 93         | 0.39 |
| Texanol 9%       | 460.4               | $4.24 \times 10^{05}$ | 98         | 0.38 |
| DPnB 0%          | 447.6               | $4.47 \times 10^{05}$ | 82         | 0.43 |
| DPnB 3%          | 452.8               | $4.45 \times 10^{05}$ | 89         | 0.40 |
| DPnB 6%          | 455.4               | $4.45 \times 10^{05}$ | 92         | 0.40 |
| DPnB 9%          | 460.2               | $4.0 \times 10^{05}$  | 98         | 0.38 |
| EEA 0%           | 445.5               | $1.19 \times 10^{08}$ | 83         | 0.45 |
| EEA 3%           | 451.0               | $1.02 \times 10^{08}$ | 88         | 0.42 |
| EEA 6%           | 454.9               | $1.01 \times 10^{08}$ | 91         | 0.40 |
| EEA 9%           | 460.2               | $9.37 \times 10^{07}$ | 97         | 0.36 |
| DPM 0%           | 447.6               | $4.47 \times 10^{05}$ | 82         | 0.43 |
| DPM 3%           | 449.2               | $4.47 \times 10^{05}$ | 86         | 0.44 |
| DPM 6%           | 449.9               | $4.43 \times 10^{05}$ | 87         | 0.43 |
| DPM 9%           | 450.2               | $4.38 \times 10^{05}$ | 87         | 0.43 |

Table S8. Fluorescence parameters of MMA/EA  $T_g$  20 °C latex, obtained after fitting band shapes with equation 1.

| MMA/EA $T_g$ 20 °C |                    |                       |            |      |
|--------------------|--------------------|-----------------------|------------|------|
| Co-solvent % w/w   | Emission max. (nm) | Intensity (a.u.)      | Width (nm) | Skew |
| EEH 0%             | 478.6              | $2.92 \times 10^{08}$ | 120        | 0.33 |
| EEH 3%             | 485.0              | $2.52 \times 10^{08}$ | 126        | 0.35 |
| EEH 6%             | 493.4              | $2.09 \times 10^{08}$ | 130        | 0.32 |
| EEH 9%             | 498.7              | $1.20 \times 10^{08}$ | 136        | 0.31 |
| Texanol 0%         | 477.0              | $4.79 \times 10^{05}$ | 101        | 0.32 |
| Texanol 3%         | 482.2              | $3.91 \times 10^{05}$ | 106        | 0.31 |
| Texanol 6%         | 489.2              | $3.32 \times 10^{05}$ | 111        | 0.31 |
| Texanol 9%         | 494.9              | $2.69 \times 10^{05}$ | 115        | 0.30 |
| DPnB 0%            | 477.0              | $4.79 \times 10^{05}$ | 101        | 0.32 |
| DPnB 3%            | 484.6              | $3.54 \times 10^{05}$ | 107        | 0.31 |
| DPnB 6%            | 492.7              | $2.99 \times 10^{05}$ | 113        | 0.30 |
| DPnB 9%            | 499.3              | $2.49 \times 10^{05}$ | 119        | 0.29 |
| EEA 0%             | 478.0              | $3.41 \times 10^{08}$ | 127        | 0.35 |
| EEA 3%             | 484.3              | $2.61 \times 10^{08}$ | 125        | 0.34 |
| EEA 6%             | 492.9              | $2.23 \times 10^{08}$ | 127        | 0.33 |
| EEA 9%             | 500.8              | $1.92 \times 10^{08}$ | 132        | 0.31 |
| DPM 0%             | 477.0              | $4.79 \times 10^{05}$ | 101        | 0.32 |
| DPM 3%             | 478.6              | $4.23 \times 10^{05}$ | 103        | 0.32 |
| DPM 6%             | 479.8              | $3.95 \times 10^{05}$ | 104        | 0.32 |
| DPM 9%             | 481.2              | $3.76 \times 10^{05}$ | 105        | 0.32 |

Table S9. Fluorescence parameters of MMA/EA  $T_g$  60 °C latex, obtained after fitting band shapes with equation 1.

| MMA/EA $T_g$ 60 °C |                    |                       |            |      |
|--------------------|--------------------|-----------------------|------------|------|
| Co-solvent % w/w   | Emission max. (nm) | Intensity (a.u.)      | Width (nm) | Skew |
| EEH 0%             | 468.7              | $3.03 \times 10^{08}$ | 118        | 0.37 |
| EEH 3%             | 472.7              | $3.00 \times 10^{08}$ | 118        | 0.35 |
| EEH 6%             | 479.2              | $2.84 \times 10^{08}$ | 125        | 0.37 |
| EEH 9%             | 484.3              | $2.43 \times 10^{08}$ | 128        | 0.36 |
| Texanol 0%         | 468.2              | $4.97 \times 10^{05}$ | 97         | 0.34 |
| Texanol 3%         | 469.3              | $5.18 \times 10^{05}$ | 98         | 0.34 |
| Texanol 6%         | 474.0              | $4.73 \times 10^{05}$ | 101        | 0.34 |
| Texanol 9%         | 479.0              | $4.18 \times 10^{05}$ | 105        | 0.33 |
| DPnB 0%            | 468.2              | $4.97 \times 10^{05}$ | 97         | 0.34 |
| DPnB 3%            | 470.7              | $4.53 \times 10^{05}$ | 99         | 0.34 |
| DPnB 6%            | 478.0              | $4.39 \times 10^{05}$ | 104        | 0.33 |
| DPnB 9%            | 485.7              | $3.21 \times 10^{05}$ | 111        | 0.33 |
| EEA 0%             | 468.8              | $3.55 \times 10^{08}$ | 123        | 0.37 |
| EEA 3%             | 471.6              | $3.09 \times 10^{08}$ | 115        | 0.35 |
| EEA 6%             | 477.1              | $3.01 \times 10^{08}$ | 123        | 0.36 |
| EEA 9%             | 484.2              | $2.85 \times 10^{08}$ | 127        | 0.35 |
| DPM 0%             | 468.2              | $4.97 \times 10^{05}$ | 97         | 0.34 |
| DPM 3%             | 469.1              | $4.68 \times 10^{05}$ | 97         | 0.34 |
| DPM 6%             | 469.7              | $4.68 \times 10^{05}$ | 98         | 0.34 |
| DPM 9%             | 470.4              | $4.53 \times 10^{05}$ | 99         | 0.34 |

## Gel permeation chromatography of MFT-copolymerized S/2-EHA and MMA/EA latices

The distribution of copolymerized MFT in the copolymer in S/2-EHA and MMA/EA latices was analyzed with gel permeation chromatography (GPC) using a Waters Alliance Gel Permeation Chromatograph coupled with a Waters 410 dRI refractive index detector and a Shimadzu RF 10a XL fluorescence detector (excitation 380 nm; detection 570 nm). Tetrahydrofuran (THF; stabilized HPLC grade, 99.8% pure) containing 1% acetic acid at a flow rate of 1.0 ml/min was used as eluent. One guard column PLgel 10  $\mu\text{m}$  ( $50 \times 7.5$  mm) and three PLgel 10  $\mu\text{m}$  Mixed-B ( $300 \times 7.5$  mm) columns were used. Polymer standards were Polystyrene MP 160-10 000 000.

GPC traces of S/2-EHA and MMA/EA  $T_g$  20 and 60  $^{\circ}\text{C}$  latices are presented in fig. S1. Neat latices were also measured and they showed no fluorescent signal at this retention time. It is quite obvious from fig. S1 that the peaks of refractive index and fluorescence emission emerge at the same retention time. This shows that MFT is homogeneously distributed over the whole molecular weight range of the copolymer.

The fluorescence signal for MMA/EA  $T_g$  20  $^{\circ}\text{C}$  (fig. S1c) was weaker than the other three due to a lower amount of copolymerized MFT (6 ppm vs. 18 ppm).

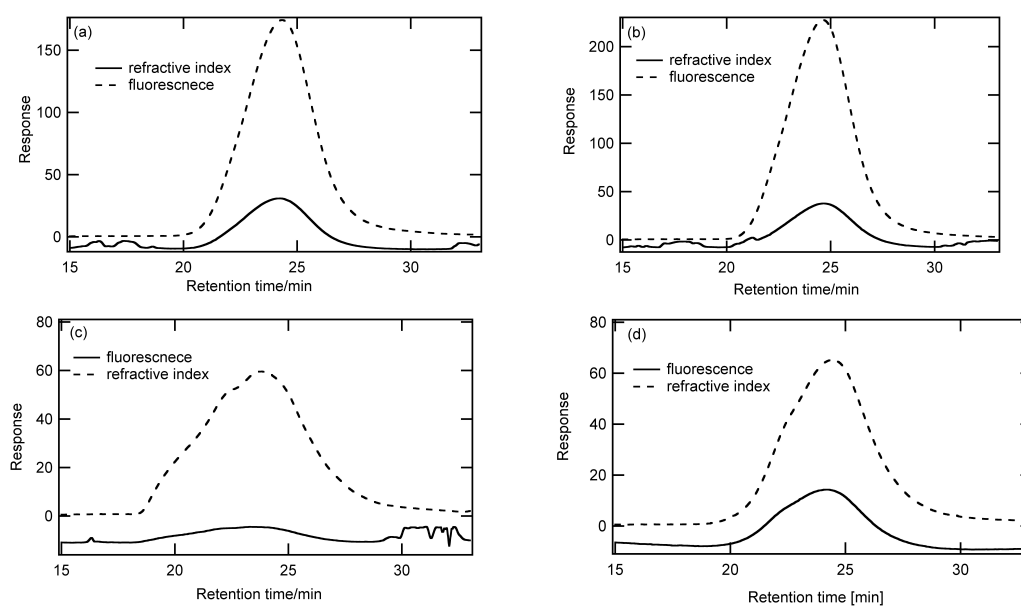

Fig. S1. GPC chromatograms showing refractive index and fluorescence signals of (a) S2-EHA  $T_g$  20  $^{\circ}\text{C}$ , (b) S2-EHA  $T_g$  60  $^{\circ}\text{C}$ , (c) MMA/EA  $T_g$  20  $^{\circ}\text{C}$ , (d) MMA/EA  $T_g$  60  $^{\circ}\text{C}$ .



### Time-Resolved fluorescence of neat hydrophobic S/2-EHA latex (non-labeled latex)

Blank samples of S/2-EHA low and high  $T_g$  non-labeled and non-formulated latices were measured on TCSPC (fig. S2). It is worth to mention that both of these unlabeled latices exhibited decay in the region of interest, i.e. 400-600 nm with two lifetimes; longer lifetime (small amplitude) and shorter lifetime (larger amplitude) showing that latex contained some impurity. For low  $T_g$  neat (non-labeled) latex at 440 nm wavelength time components were;  $\tau_0$  2.9 ns ( $A_0$  30%) and shorter  $\tau_1$  0.5 ns ( $A_1$  70%). For high  $T_g$  latex it was  $\tau_0$  7.2 ns ( $A_0$  48%) and shorter time component  $\tau_1$  1.4 ns ( $A_1$  50%) showing that while measuring labeled latices at this particular wavelength fluorescence decay could have an inaccuracy due to lifetime component impurities present in the latex. Due to this impurity it can be expected that values of lifetime of labeled latex at  $\lambda_{max} = 440$  nm would be slightly higher than the actual.

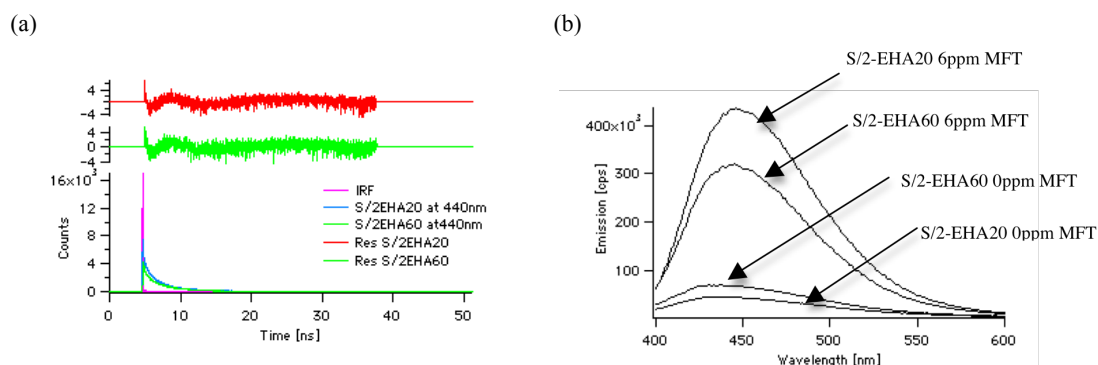

Fig. S2. Fluorescence decay of S/2-EHA  $T_g$  20 and 60 °C blank samples (no fluorescent probe, no co-solvent), (a) time-resolved fluorescence ( $\lambda_{exc} = 375$  nm measured at 440 nm wavelength) (b) steady-state fluorescence ( $\lambda_{exc} = 380$ nm )

### Time resolved of hydrophilic MMA/EA neat latex (non-labeled latex)

Like styrene-based latex, MMA/EA low and high  $T_g$  non-labeled and non-formulated latices also exhibited bi-exponential decay due to impurity. Low  $T_g$  MMA/EA latex exhibited two lifetimes  $\tau_0$  4-6 ns ( $A_0$  27-36%) and  $\tau_1$  1 ns ( $A_1$  72-63%). High  $T_g$  MMA/EA latex showed  $\tau_0$  3.8-6 ns ( $A_0$  37-31%) and  $\tau_1$  1 ns ( $A_1$  62-68%).
